# Supplementary material for: The Effect of Design Features on Relationship Quality with Embodied Conversational Agents: A Systematic Review
Source: Springer Nature journal article supplement (doi:10.1007/s12369-020-00680-7), 2020-09-24
Supplement: 12369_2020_680_MOESM1_ESM.pdf [file 12369_2020_680_MOESM1_ESM.pdf]

## **Appendix 1.**

Search strategy for EMBASE

Search title, abstract, keywords only

("embodied agent\*" OR "embodied conversation\* agent" OR "embodied conversation\* interface agent\*" OR "embodied social agent\*" OR "embodied virtual agent\*" OR "embodied companion agent\*" OR "embodied computer agent\*" OR relational agent\*" OR "empathic agent\*" OR "conversation\* agent\*" OR "interface agent\*" OR "animated agent\*" OR "computer agent\*" OR "emotion agent\*" OR "exercise agent\*" OR "motivation\* agent\*" OR "virtual agent\*" OR "virtual character\*" OR "virtual human\*" OR "virtual coach\*" OR "virtual advisor\*" OR "virtual specialist\*" OR "virtual dialog agent\*" OR "virtual dialogue agent\*" OR avatar OR "e-health advisor\*" OR "ehealth advisor\*") AND ("social\* close\*" OR rapport OR bond OR intimacy OR relationship OR friend\* OR "relationship quality" OR "therapeutic alliance") AND (trial OR experiment\* OR "pilot study")
